# Supplementary material
Source: publisher figshare collection journal article supplement (https://sage.figshare.com/ndownloader/files/15654011)
Supplement: Supplementary file [file 15654011]

**Food safety and nutrition for low-income urbanites:  
exploring a social justice dilemma in consumption policy**

**Supplementary information**

**S4: ANALYSIS FRAMEWORK**

| Combine dataset:        | With dataset:                                        | Analyses                                                                                                                                                                                                                                                               |
|-------------------------|------------------------------------------------------|------------------------------------------------------------------------------------------------------------------------------------------------------------------------------------------------------------------------------------------------------------------------|
| Census                  | Household survey                                     | <ul style="list-style-type: none"><li>- Where, when, how (transport means) and what people buy related to food retail proximity and available assortment</li><li>- Where and what people buy related to risk perception and trust</li></ul>                            |
| 24-hour dietary recall  | Census                                               | <ul style="list-style-type: none"><li>- What people eat and where it is purchased in relation to food retail availability</li></ul>                                                                                                                                    |
| 24-hour dietary recall  | Household survey                                     | <ul style="list-style-type: none"><li>- What people eat and where it is purchased in relation to food shopping practices and preferences</li><li>- What people eat and where it is purchased in relation to food risk perception and trust (vegetables only)</li></ul> |
| Price data (vegetables) | Census<br>Household survey<br>24-hour dietary recall | <ul style="list-style-type: none"><li>- Where and what people buy related to food retail availability AND prices</li><li>- Where and what people buy related to risk perception, trust AND prices</li></ul>                                                            |
